# Supplementary material
Source: PubMed Central journal article supplement (PMC1735613)

**a**

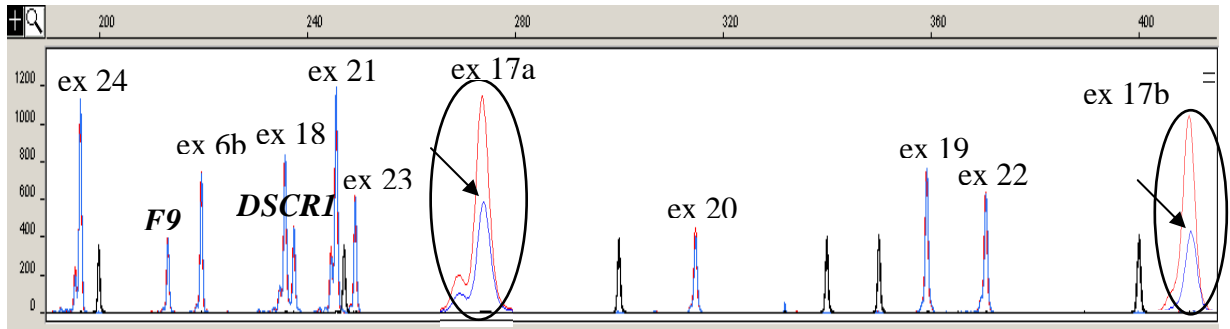

**b**

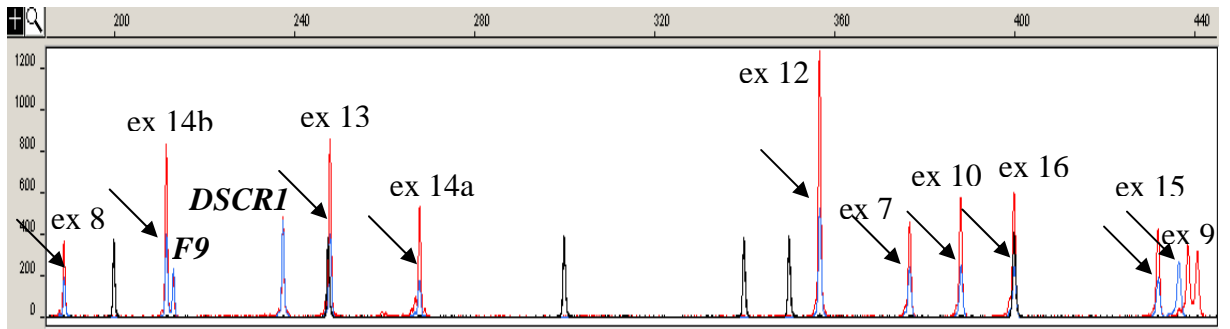

**c**

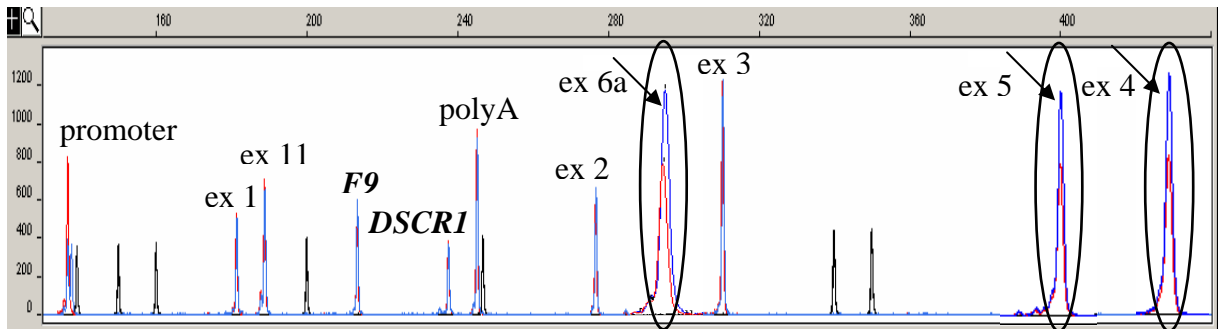

Supplement: jmedgene_41_11_e118__1.pdf [file jmedgene_41_11_e118__1.pdf]
